# Supplementary material for: Spatiotemporal cytoskeleton organizations determine morphogenesis of multicellular trichomes in tomato
Source: PLoS Genet. 2019 Oct 4;15(10):e1008438. doi: 10.1371/journal.pgen.1008438 (PMC6812842; doi:10.1371/journal.pgen.1008438)
Supplement: S3 Table — (XLSX) [file pgen.1008438.s012.xlsx]

## Sheet: Sheet1
Table S3 PCR primers used in this paper
Primer	Sequence
SCAR2-EMS-F	CAGTTGAGGAAGGTTACAGAGCG
SCAR2-EMS-R	TTACAGGGGGTGGGAAAAGC
ARPC1-EMS-F	GAGTAAGCTTATCAGGAAAAG
ARPC1-EMS-R	TCTCAAGAAACTCCAGAGTCC
ARPC4-EMS-F	ATGGGTTAGAGGAATCGACGTG
ARPC4-EMS-R	TGCTGGCAGCTAAATTAACAAC
SCAR2-CRISPR-F	GAATCTAACAGTGTAG TTTGACTCCATCAGCTGTTCTTGGGTTTTAGAGCTAGAAATAG
SCAR2-CRISPR-R	GCTATTTCTAGCTCTA AAACATTGACTTCATCTAAGCATGCAAACTACACTGTTAGATT
SCAR2-OE-F	CATTTGGAGAGGACACGCTCGAGCATTCACATTCGCCTCAACTCT
SCAR2-OE-R	TCTCATTAAAGCAGGACTCTAGACTTGGACAAATCAAAGCCACTACTA
